# Supplementary material
Source: Springer Nature journal article supplement (https://www.springermedizin.de/resource/supplementary/13058_2011_2958_MOESM4_ESM.pdf/9702962)

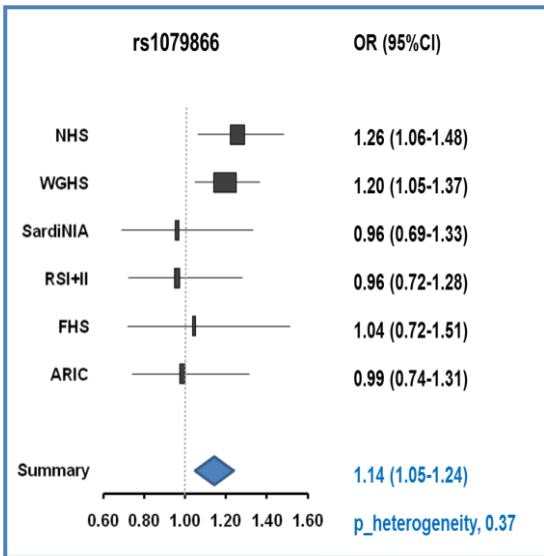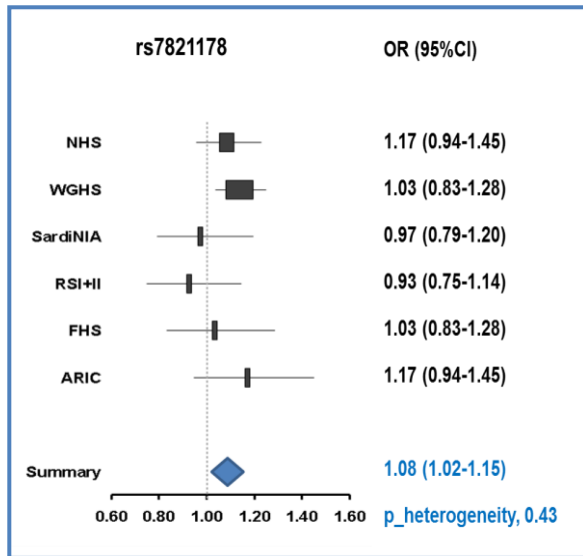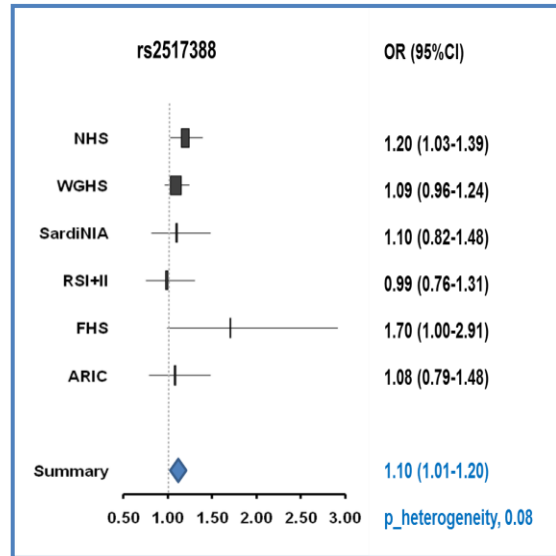

Supplement: MOESM4 [file 9702962]
